# Supplementary material for: Reconstructing the Three-Dimensional GABAergic Microcircuit of the Striatum
Source: PLOS journal article supplement (doi:10.1371/journal.pcbi.1001011), 2010-11-24
Supplement: S2 (10.1371/journal.pcbi.1001011.s002) [file journal.pcbi.1001011.s002]

301 Moved Permanently

# Moved Permanently

The document has moved here.

---

Apache Server at www.ploscompbiol.org Port 80
